# Supplementary material
Source: PubMed Central journal article supplement (PMC8669713)
Supplement: pt1c00226_si_001.pdf [file pt1c00226_si_001.pdf]

# High-throughput screening reveals new glutaminase inhibitor molecules

Renna K. E. Costa <sup>1,2†</sup>, Camila Rodrigues<sup>†3</sup>, Jean C. H. Campos<sup>1†</sup>, Luciana Paradelo <sup>1,2†</sup>,  
Marilia M. Dias <sup>1</sup>, Bianca Novaes da Silva<sup>1</sup>, Cyro von Zuben de Valega Negrao<sup>1,2</sup>, Kaliandra  
de Almeida Gonçalves<sup>1</sup>, Caroline F. R. Ascensão <sup>1,2</sup>, Douglas Adamoski <sup>1,2</sup>, Gustavo  
Fernando Mercaldi<sup>1</sup>, Alliny C. S. Bastos<sup>1</sup>, Fernanda A. H. Batista<sup>1</sup>, Ana Carolina Figueira<sup>1</sup>,  
Artur T. Cordeiro<sup>1</sup>, Andre L. B. Ambrosio<sup>1</sup>, Rafael V. C. Guido<sup>3\*†</sup>, Sandra M. G. Dias<sup>1\*†</sup>

## Supplementary Information

Supplementary Figure S1  
Supplementary Figure S2  
Supplementary Figure S3  
Supplementary Figure S4  
Supplementary Figure S5  
Supplementary Figure S6  
Supplementary Figure S7  
Supplementary Figure S8  
Supplementary Figure S9  
Supplementary Table S1  
Supplementary Table S2  
Supplementary Table S3  
Supplementary Table S4

Supplementary Figure 1

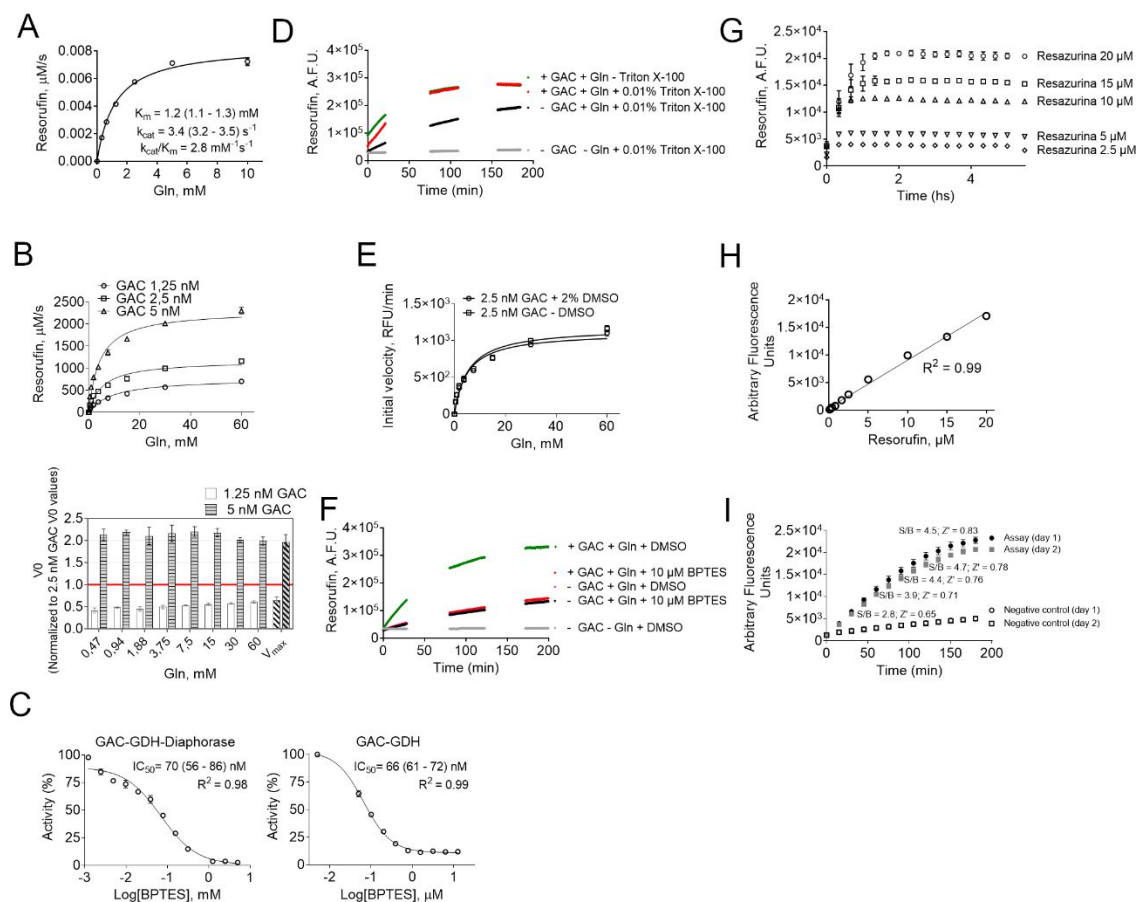

**Supplementary Figure S1. Assay optimization.** *A*, Michaelis-Menten of the GAC-GDH-Diaphorase fluorescent coupled assay. Obtained  $K_m$ ,  $k_{cat}$  and  $k_{cat}/K_m$  for 2.5 nM of enzyme are very close to the same parameters measured for GAC in a GAC-GDH absorbance assay previously published (41) (see table for comparison). *B*, Above, Michaelis-Menten of the GAC-GDH-Diaphorase fluorescent coupled assay using 1,25 nM and 5 nM; below, the ratio between  $V_0$  measured for each glutamine concentration (and  $V_{max}$ ) when using 1,25 nM GAC over 2,5 nM GAC (white bars) or 5 nM GAC over 2,5 nM GAC (gray bars), showing the values are proportional to the GAC concentration. The proportionality proves the reaction is driven by GAC. *C*, comparing the  $IC_{50}$  of BPTES over the GAC-GDH-Diaphorase fluorescent coupled assay and the GAC-GDH absorbance assay. *D*, Measured RFU of the GAC-GDH-Diaphorase fluorescent coupled assay over time showing that 0.01% Triton X-100 does not affect measurement. *E*, Michaelis-Menten of the GAC-GDH-Diaphorase fluorescent coupled assay showing that 2% DMSO does not affect the curve qualitatively. *F*, Measured RFU of the GAC-GDH-Diaphorase fluorescent coupled assay in different conditions over 200 minutes showing

that either GAC removal (-GAC +Gln + 2% DMSO) or BPTES 10  $\mu$ M (+GAC + Gln + 10  $\mu$ M BPTES) treatment gives equivalent measurements. *G*, Measured RFU of the GAC-GDH-Diaphorase fluorescent coupled assay over time showing that 20  $\mu$ M resorufin gives the highest signal and best S/N (values not shown). *H*, RFU obtained for different amounts (0 to 20  $\mu$ M) of the fluorescent product, resorufin, showing the dynamic range of the reaction. *I*, Reproducibility of the GAC-GDH-Diaphorase fluorescent coupled assay over two consecutive days. *Z'* and S/B for each data point of Assay (day 1).

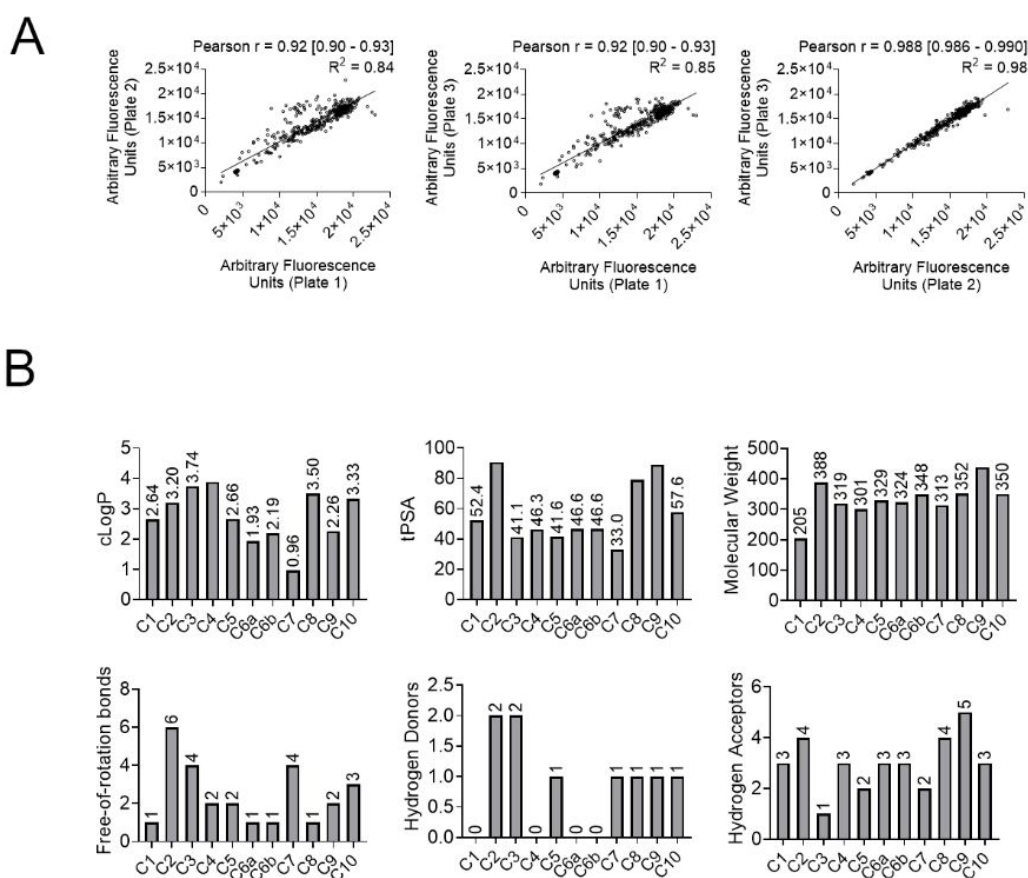

**Supplementary Figure S2.** *A*, Confirmation assay of 320 hits was performed in triplicate after cherry-picking. Correlation between plate 1 and 2 (on the left), plates 1 and 3 (in between) and plates 2 and 3 (on the right). Pearson correlation *r* and *R*<sup>2</sup> values are shown above each graph. *B*, cLogP, topological polar superficial area (tPSA), Molecular Weight, number of free-of-rotation bonds, number of hydrogen bonds donors and acceptors graphs of the 11 re-supplied compounds.

A

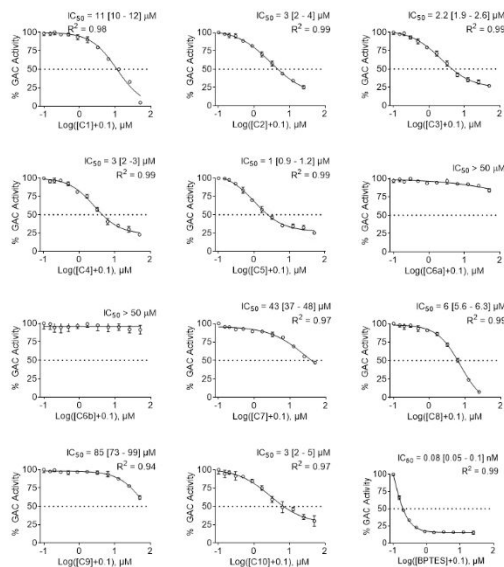

B

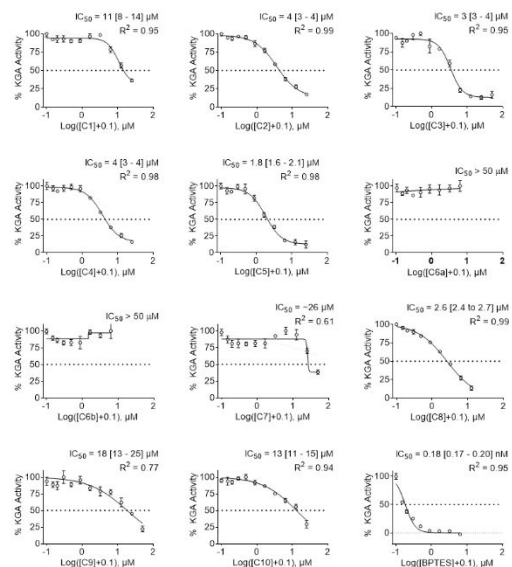

**Supplementary Figure S3.** A, curves of C1-C10 on the GAC (A) or KGA (B) enzymatic activity. Values within the brackets represents an interval confidence of 95% (CI 95%).



Supplementary Figure 4

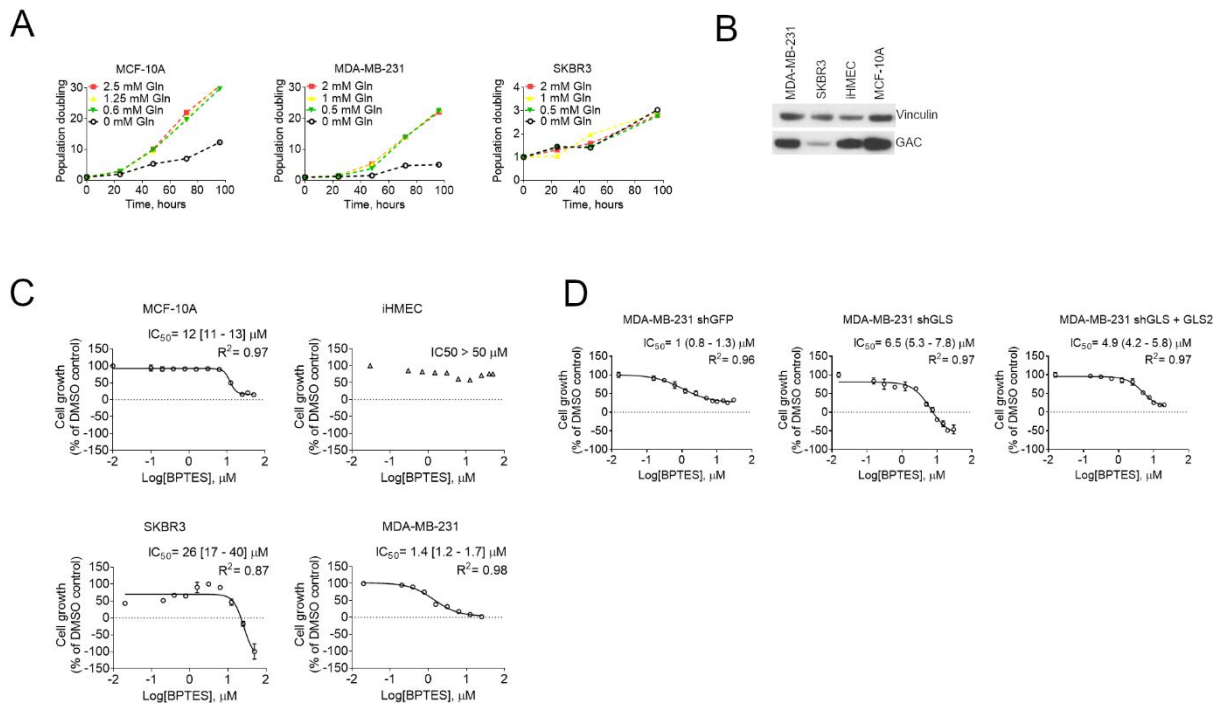

**Supplementary Figure S4. Glutamine-deprivation and BPTES effect on cell growth.** *A*, Growth response assay of MDA-MB-231, a TNBC cell line, SKBR3, a non-TNBC cell line and the non-tumorigenic MCF-10A cell line to different concentrations of glutamine in the media. *B*, Western blot showing the GLS levels in the cell lines. Growth dose-response assay of BPTES over MDA-MB-231, SKBR3, MCF-10A and hTert-immortalized iHMEC (*C*) and MDA-MB-231 shGFP, shGLS and shGLS expressing GLS2 ectopically (*D*). On (*C*, *D*), the data was normalized and 0% was set as the number of seeded cells and 100% as the highest number of cells. Doses below the dashed lines indicate the concentrations that lead to cell death (final number of cells after 48 hours is smaller than the number of seeded cells).  $\text{IC}_{50}$  [95% CI] and  $R^2$  of the adjusted sigmoidal curve are displayed. Graphics in *A*, *C-D*, each bar represents the mean  $\pm$  SD of  $n = 4$  replicates.



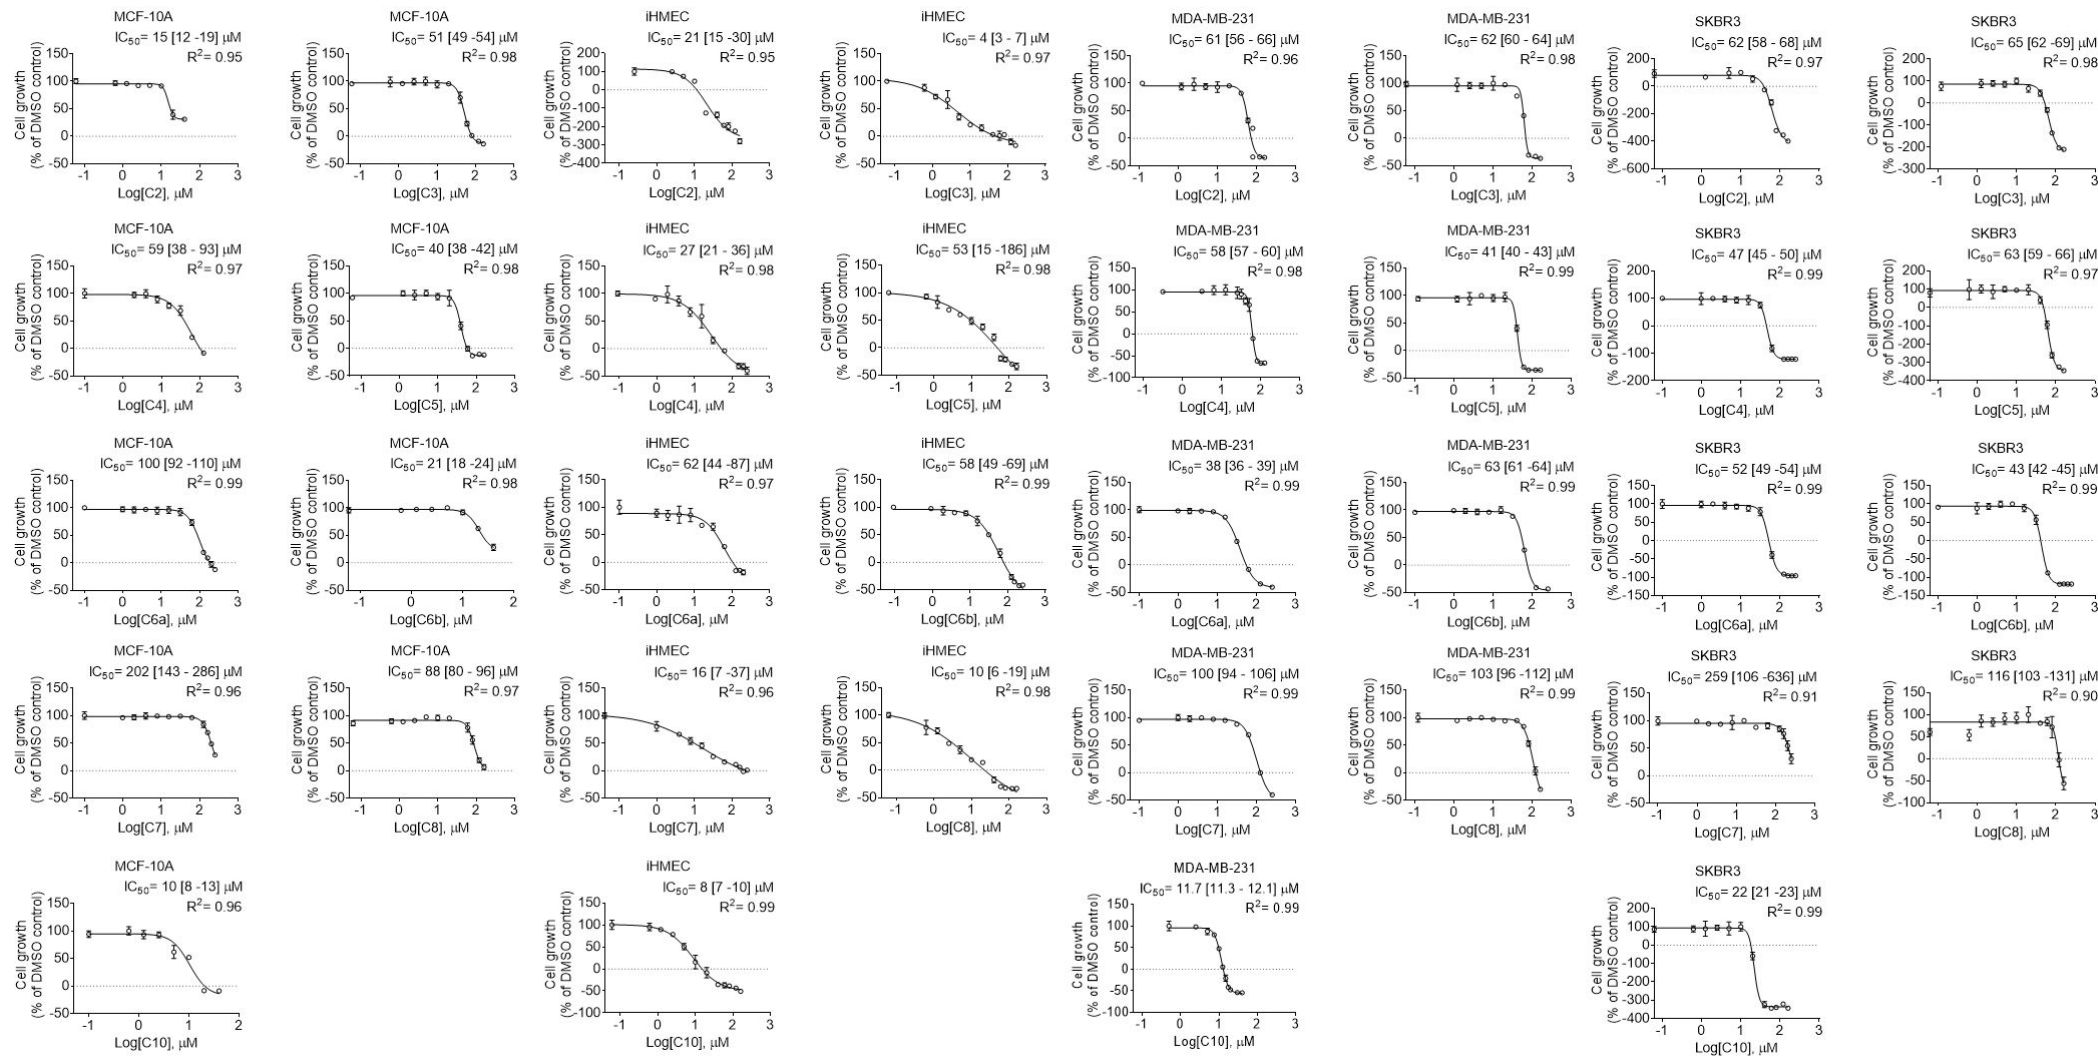



**Supplementary Figure S5.** IC<sub>50</sub> curves of C2-C8 and C10 on the MCF-10A, iHMEC, MDA-MB-231 and SKBR3 cell lines growth. Values within the brackets represents an interval confidence of 95% (CI 95%).

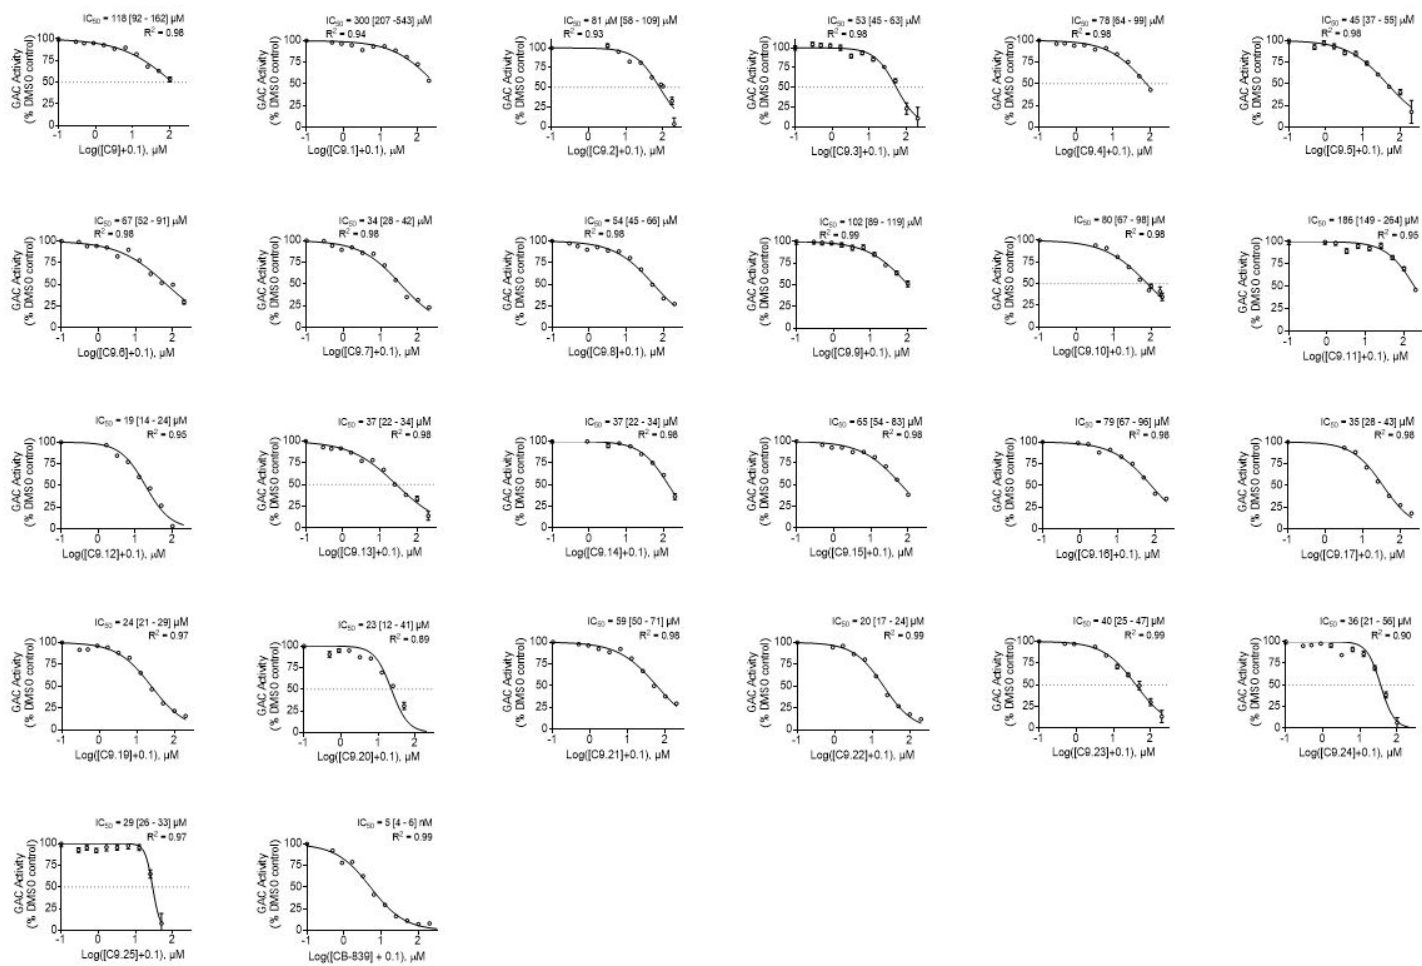

**Supplementary Figure S6.**  $\text{IC}_{50}$  curves of C9 analogues on the GAC enzymatic activity. Values within the brackets represents an interval confidence of 95% (CI 95%).

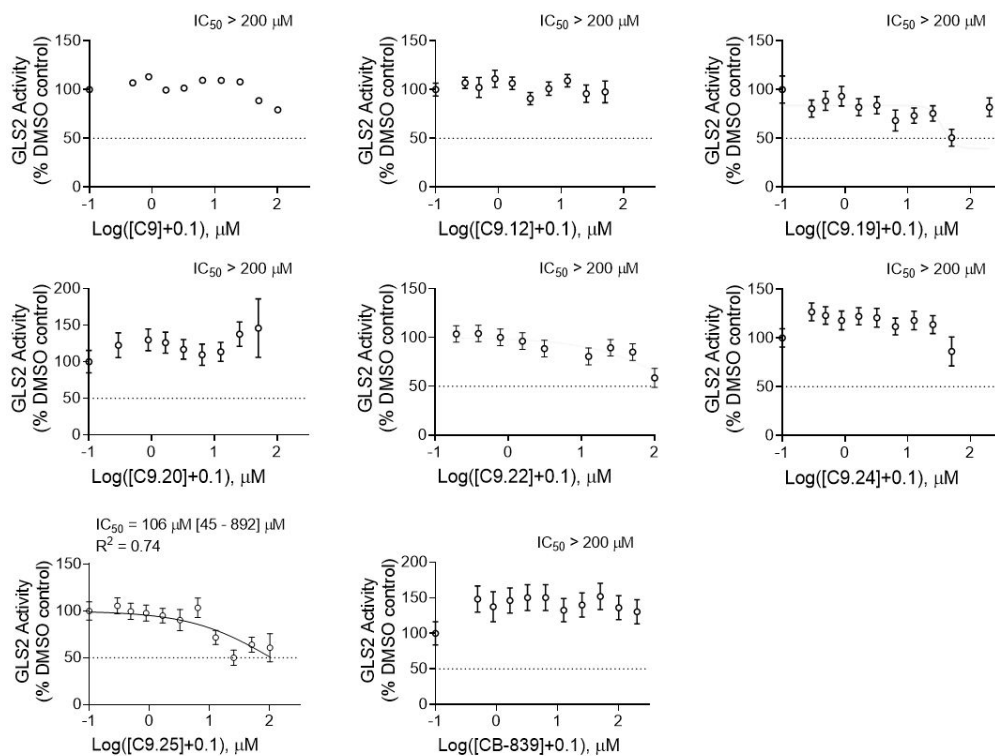

**Supplementary Figure S7.** IC<sub>50</sub> curves of selected C9 analogues on the GLS2 enzymatic activity. Values within the brackets represents an interval confidence of 95% (CI 95%).

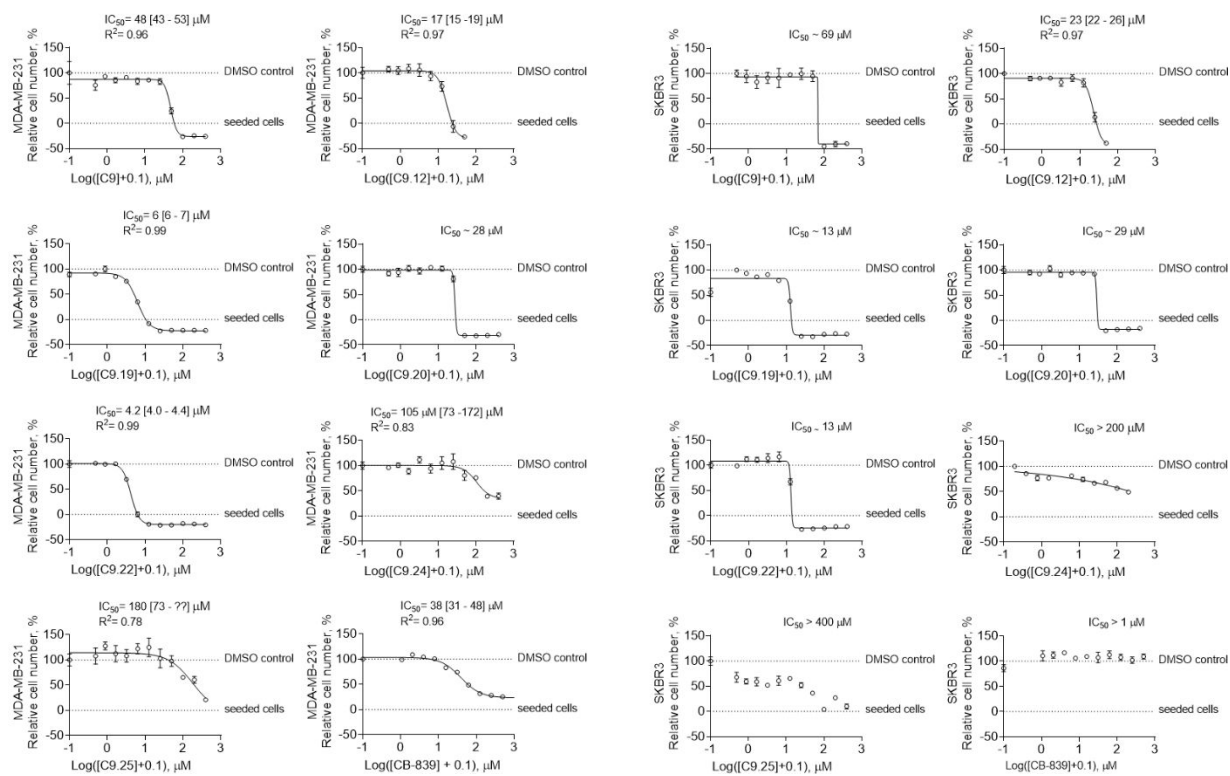

**Supplementary Figure S8.** IC<sub>50</sub> curves of selected C9 analogues on the MDA-MB-231 (on the left) and SKBR3 (on the right) cell lines growth. Values within the brackets represents an interval confidence of 95% (CI 95%).

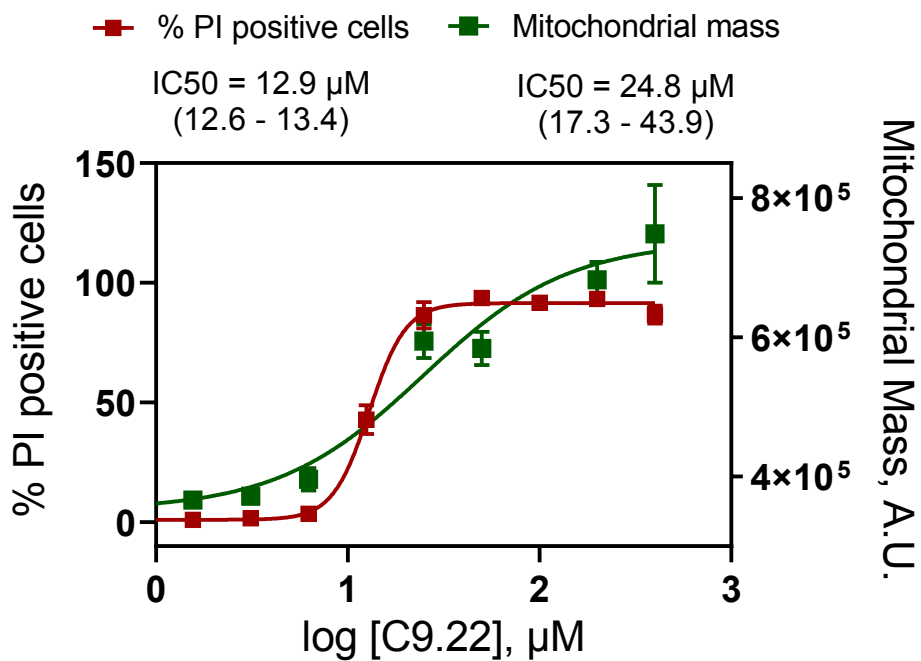

**Supplementary Figure 9.** IC<sub>50</sub> curves of C9.22 on the MDA-MB-231 cell line for necrosis (propidium iodide, PI) and mitochondrial mass staining (Mitotracker Deep Red; cytotoxicity marker). Values within the brackets represents an interval confidence of 95%.

**Supplementary Table S1** - Excel file with 6 spreadsheets containing raw and processed HTS data; Provided as a separated file.

**Supplementary Table S2** – The final 100 compounds hit list.

| Compound ressupplied | Compound # (100 final hits) | Chembridge number | % inhibition GAC retest average | % inhibition GDH/Diaphorase | % inhibition GAC retest average - % inhibition GDH | Cluster #     |
|----------------------|-----------------------------|-------------------|---------------------------------|-----------------------------|----------------------------------------------------|---------------|
|                      | 1                           | 5251606           | 105.8                           | 17.8                        | 88.0                                               | non-clustered |
|                      | 2                           | 5455995           | 88.7                            | 0.0                         | 88.7                                               | non-clustered |
|                      | 3                           | 7983133           | 88.6                            | 24.7                        | 63.9                                               | non-clustered |
|                      | 4                           | 9109040           | 87.0                            | 3.7                         | 83.3                                               | G4            |
|                      | 5                           | 5266583           | 85.8                            | 2.3                         | 83.5                                               | non-clustered |
|                      | 6                           | 6985461           | 79.7                            | 17.1                        | 62.6                                               | non-clustered |
| (C1)                 | 7                           | 7992402           | 73.4                            | 0.0                         | 73.4                                               | non-clustered |
| (C2)                 | 8                           | 9155049           | 72.9                            | 2.4                         | 70.5                                               | G11           |
|                      | 9                           | 7975549           | 72.3                            | 13.9                        | 58.4                                               | non-clustered |
|                      | 10                          | 5917156           | 72.2                            | 11.0                        | 61.2                                               | G17           |
| (C3)                 | 11                          | 7956101           | 69.2                            | 0.0                         | 69.2                                               | non-clustered |
| (C4)                 | 12                          | 9125354           | 69.2                            | 0.0                         | 69.2                                               | G2            |
| (C5)                 | 13                          | 7952342           | 68.5                            | 0.0                         | 68.5                                               | G7            |
| (C6a)                | 14                          | 6744277           | 60.2                            | 0.0                         | 60.2                                               | G12           |
| (C7)                 | 15                          | 5354303           | 60.2                            | 0.0                         | 60.2                                               | G5            |
| (C8)                 | 16                          | 7962214           | 58.3                            | 0.0                         | 58.3                                               | non-clustered |
| (C6b)                | 17                          | 5603967           | 57.3                            | 0.0                         | 57.3                                               | G12           |
|                      | 18                          | 7992232           | 57.2                            | 0.0                         | 57.2                                               | G15           |
|                      | 19                          | 9038938           | 57.0                            | 0.0                         | 57.0                                               | non-clustered |
|                      | 20                          | 9001794           | 56.8                            | 0.2                         | 56.6                                               | non-clustered |
|                      | 21                          | 5919129           | 56.7                            | 8.2                         | 48.4                                               | G17           |
|                      | 22                          | 5331342           | 54.6                            | 11.3                        | 43.3                                               | G6            |
|                      | 23                          | 7832691           | 53.7                            | 0.0                         | 53.7                                               | G15           |
|                      | 24                          | 7874229           | 52.8                            | 5.0                         | 47.7                                               | non-clustered |
|                      | 25                          | 5141313           | 51.7                            | 0.0                         | 51.7                                               | non-clustered |
|                      | 26                          | 6573489           | 51.7                            | 12.4                        | 39.3                                               | non-clustered |
|                      | 27                          | 9074873           | 51.7                            | 13.3                        | 38.4                                               | G8            |
|                      | 28                          | 7954758           | 51.2                            | 0.0                         | 51.2                                               | G3            |

|       |    |         |      |      |      |               |
|-------|----|---------|------|------|------|---------------|
|       | 29 | 9007772 | 51.0 | 0.0  | 51.0 | non-clustered |
|       | 30 | 9082772 | 50.5 | 0.0  | 50.5 | G13           |
| (C9)  | 31 | 9007737 | 50.0 | 0.0  | 50.0 | non-clustered |
|       | 32 | 5346214 | 49.3 | 0.0  | 49.3 | G5            |
| (C10) | 33 | 7951061 | 48.3 | 0.0  | 48.3 | G12           |
|       | 34 | 9064772 | 47.3 | 0.0  | 47.3 | G14           |
|       | 35 | 7943337 | 46.6 | 0.7  | 45.9 | G16           |
|       | 36 | 5211912 | 46.4 | 13.3 | 33.2 | non-clustered |
|       | 37 | 9123924 | 46.4 | 0.0  | 46.4 | non-clustered |
|       | 38 | 9077494 | 46.4 | 1.2  | 45.1 | G13           |
|       | 39 | 6373017 | 46.3 | 0.0  | 46.3 | non-clustered |
|       | 40 | 9125395 | 46.1 | 0.0  | 46.1 | G2            |
|       | 41 | 5478253 | 45.9 | 0.0  | 45.9 | non-clustered |
|       | 42 | 9139619 | 45.6 | 0.0  | 45.6 | non-clustered |
|       | 43 | 5621638 | 45.2 | 0.0  | 45.2 | G12           |
|       | 44 | 5319283 | 42.3 | 14.5 | 27.8 | non-clustered |
|       | 45 | 7893819 | 41.9 | 0.0  | 41.9 | G13           |
|       | 46 | 7797911 | 41.7 | 2.7  | 39.1 | non-clustered |
|       | 47 | 7969373 | 41.7 | 12.3 | 29.4 | non-clustered |
|       | 48 | 7615470 | 41.6 | 1.4  | 40.1 | non-clustered |
|       | 49 | 7946808 | 40.8 | 12.2 | 28.6 | G11           |
|       | 50 | 7690736 | 40.7 | 11.4 | 29.2 | non-clustered |
|       | 51 | 5348920 | 40.5 | 0.0  | 40.5 | G5            |
|       | 52 | 7987960 | 40.3 | 0.0  | 40.3 | non-clustered |
|       | 53 | 9064882 | 40.1 | 0.0  | 40.1 | G15           |
|       | 54 | 9102535 | 39.4 | 0.0  | 39.4 | G4            |
|       | 55 | 7970522 | 38.8 | 0.0  | 38.8 | G7            |
|       | 56 | 7953673 | 38.8 | 6.0  | 32.8 | non-clustered |
|       | 57 | 7745039 | 38.8 | 5.4  | 33.5 | G8            |
|       | 58 | 7950985 | 38.7 | 0.0  | 38.7 | non-clustered |
|       | 59 | 9108360 | 38.6 | 2.8  | 35.8 | G13           |
|       | 60 | 9014421 | 38.1 | 10.3 | 27.8 | G10           |
|       | 61 | 9153561 | 37.8 | 0.2  | 37.6 | non-clustered |
|       | 62 | 6946489 | 37.2 | 7.2  | 29.9 | non-clustered |
|       | 63 | 5350946 | 37.1 | 0.0  | 37.1 | G5            |
|       | 64 | 7257347 | 36.7 | 0.0  | 36.7 | non-clustered |

|  |     |         |      |     |      |               |
|--|-----|---------|------|-----|------|---------------|
|  | 65  | 9010720 | 36.7 | 0.0 | 36.7 | G12           |
|  | 66  | 5857415 | 36.7 | 0.0 | 36.7 | non-clustered |
|  | 67  | 9106880 | 36.5 | 0.0 | 36.5 | G4            |
|  | 68  | 9109696 | 36.4 | 5.1 | 31.4 | non-clustered |
|  | 69  | 9007162 | 35.8 | 1.6 | 34.2 | non-clustered |
|  | 70  | 7967624 | 34.9 | 0.0 | 34.9 | G3            |
|  | 71  | 9082761 | 34.8 | 0.0 | 34.8 | G14           |
|  | 72  | 7967883 | 34.6 | 0.0 | 34.6 | non-clustered |
|  | 73  | 9001315 | 34.5 | 0.0 | 34.5 | G11           |
|  | 74  | 7991342 | 34.0 | 0.0 | 34.0 | non-clustered |
|  | 75  | 9004059 | 33.8 | 0.0 | 33.8 | G16           |
|  | 76  | 9062228 | 32.8 | 0.0 | 32.8 | non-clustered |
|  | 77  | 9101689 | 32.5 | 0.0 | 32.5 | non-clustered |
|  | 78  | 7931360 | 32.1 | 0.0 | 32.1 | G6            |
|  | 79  | 7998861 | 31.9 | 5.7 | 26.2 | non-clustered |
|  | 80  | 9096238 | 30.1 | 0.0 | 30.1 | non-clustered |
|  | 81  | 9109980 | 29.6 | 0.0 | 29.6 | G4            |
|  | 82  | 7644288 | 29.4 | 0.0 | 29.4 | G10           |
|  | 83  | 7962071 | 29.2 | 0.2 | 29.0 | non-clustered |
|  | 84  | 9078534 | 28.9 | 0.0 | 28.9 | non-clustered |
|  | 85  | 9155265 | 28.7 | 0.0 | 28.7 | non-clustered |
|  | 86  | 7569611 | 28.6 | 0.0 | 28.6 | non-clustered |
|  | 87  | 7934875 | 28.5 | 0.0 | 28.5 | non-clustered |
|  | 88  | 9063041 | 28.1 | 0.0 | 28.1 | G9            |
|  | 89  | 5924787 | 27.7 | 0.8 | 26.9 | G1            |
|  | 90  | 5930037 | 26.5 | 0.0 | 26.5 | G1            |
|  | 91  | 7625548 | 26.2 | 0.0 | 26.2 | non-clustered |
|  | 92  | 7980582 | 25.5 | 0.0 | 25.5 | non-clustered |
|  | 93  | 9059254 | 24.6 | 0.0 | 24.6 | G9            |
|  | 94  | 7938972 | 24.1 | 0.0 | 24.1 | non-clustered |
|  | 95  | 7945021 | 24.0 | 0.0 | 24.0 | non-clustered |
|  | 96  | 7997020 | 23.6 | 0.0 | 23.6 | G12           |
|  | 97  | 9102488 | 23.1 | 0.0 | 23.1 | G4            |
|  | 98  | 5373315 | 20.3 | 0.0 | 20.3 | non-clustered |
|  | 99  | 5612286 | 19.8 | 0.0 | 19.8 | G12           |
|  | 100 | 9120786 | 19.4 | 0.0 | 19.4 | non-clustered |



**Supplementary Table S3** - Drug-like properties calculated by the OpenBabel.

|     | Druglikeness | Mutagenic | Tumorigenic | Reproductive Effective | Irritant |
|-----|--------------|-----------|-------------|------------------------|----------|
| C1  | -4.9666      | none      | none        | none                   | none     |
| C2  | 2.5939       | none      | none        | none                   | none     |
| C3  | 2.6252       | none      | none        | none                   | none     |
| C4  | 4.0452       | none      | none        | none                   | none     |
| C5  | 0.7881       | none      | high        | low                    | high     |
| C6a | 2.4671       | none      | none        | high                   | low      |
| C7  | -1.182       | none      | none        | none                   | none     |
| C8  | 4.0127       | high      | high        | high                   | low      |
| C6b | 0.5554       | none      | none        | high                   | none     |
| C9  | 2.0762       | none      | none        | none                   | none     |
| C10 | 4.3483       | none      | none        | none                   | none     |
| 968 | -2.34        | none      | none        | none                   | none     |

|        |         |      |      |      |      |
|--------|---------|------|------|------|------|
| BPTES  | 3.9388  | none | none | none | none |
| CB-839 | -9.1868 | none | none | none | none |

Supplementary Table S4- *In silico* safety. ADME and physicochemical profile of the 11 resupplied compounds.

| ID     | Drug Safety Profiling |                  |                  |                   |                  |                  |           |           | ADME Profiling       |                   |                |                 |                     | PhysChem Profiling |          |          |             |            |       |          |           |                  |  |
|--------|-----------------------|------------------|------------------|-------------------|------------------|------------------|-----------|-----------|----------------------|-------------------|----------------|-----------------|---------------------|--------------------|----------|----------|-------------|------------|-------|----------|-----------|------------------|--|
|        | P-gp Substrates       | CYP1A2 Inhibitor | CYP2C9 Inhibitor | CYP2C19 Inhibitor | CYP2D6 Inhibitor | CYP3A4 Inhibitor | Ames      | hERG      | Caco-2               | PPB               | CNS            | HIA             | Metabolic Stability | LogP               | MW       | H-Donors | H-Acceptors | Rot. Bonds | Rings | Lipinski | Lead-like | Solubility       |  |
| 968    | Undefined             | Undefined        | Undefined        | Undefined         | Undefined        | Undefined        | Undefined | Undefined | Highly permeable     | Extensively bound | Non-penetrant  | Highly absorbed | Undefined           | Very lipophilic    | Moderate | Good     | Good        | Good       | Bad   | Moderate | Bad       | Highly insoluble |  |
| BPTES  | Undefined             | Undefined        | Undefined        | Undefined         | Undefined        | Undefined        | Undefined | Undefined | Highly permeable     | Undefined         | Non-penetrant  | Highly absorbed | Undefined           | Optimal            | Bad      | Good     | Good        | Bad        | Good  | Moderate | Moderate  | Highly insoluble |  |
| CB-839 | Undefined             | Undefined        | Undefined        | Undefined         | Undefined        | Undefined        | Undefined | Undefined | Highly permeable     | Undefined         | Non-penetrant  | Highly absorbed | Undefined           | Optimal            | Bad      | Good     | Good        | Bad        | Good  | Moderate | Bad       | Highly insoluble |  |
| C1     | Undefined             | Undefined        | Undefined        | Undefined         | Undefined        | Non-inhibitor    | Undefined | Undefined | Highly permeable     | Strongly bound    | Penetrant      | Highly absorbed | Undefined           | Optimal            | Good     | Good     | Good        | Good       | Good  | Good     | Good      | Insoluble        |  |
| C2     | Undefined             | Undefined        | Undefined        | Undefined         | Undefined        | Undefined        | Undefined | Undefined | Highly permeable     | Undefined         | Penetrant      | Highly absorbed | Undefined           | Optimal            | Good     | Good     | Good        | Good       | Good  | Good     | Good      | Soluble          |  |
| C3     | Undefined             | Undefined        | Undefined        | Undefined         | Undefined        | Undefined        | Undefined | Undefined | Highly permeable     | Extensively bound | Penetrant      | Highly absorbed | Undefined           | Optimal            | Good     | Good     | Good        | Good       | Good  | Good     | Good      | Highly insoluble |  |
| C4     | Undefined             | Undefined        | Undefined        | Undefined         | Undefined        | Undefined        | Undefined | Undefined | Highly permeable     | Strongly bound    | Penetrant      | Highly absorbed | Undefined           | Optimal            | Good     | Good     | Good        | Good       | Good  | Good     | Good      | Soluble          |  |
| C5     | Undefined             | Undefined        | Undefined        | Undefined         | Undefined        | Undefined        | Undefined | Undefined | Highly permeable     | Moderately bound  | Penetrant      | Highly absorbed | Undefined           | Optimal            | Good     | Good     | Good        | Good       | Good  | Good     | Good      | Insoluble        |  |
| C6a    | Undefined             | Undefined        | Undefined        | Undefined         | Non-inhibitor    | Undefined        | Undefined | Undefined | Highly permeable     | Strongly bound    | Penetrant      | Highly absorbed | Undefined           | Optimal            | Good     | Good     | Good        | Good       | Good  | Good     | Good      | Highly insoluble |  |
| C7     | Undefined             | Undefined        | Undefined        | Undefined         | Undefined        | Undefined        | Undefined | Undefined | Moderately permeable | Weakly bound      | Weak penetrant | Poorly absorbed | Undefined           | Very hydrophilic   | Good     | Good     | Good        | Good       | Good  | Moderate | Moderate  |                  |  |
| C8     | Undefined             | Undefined        | Undefined        | Undefined         | Non-inhibitor    | Undefined        | Undefined | Undefined | Highly permeable     | Extensively bound | Penetrant      | Highly absorbed | Undefined           | Optimal            | Good     | Good     | Good        | Good       | Good  | Good     | Good      | Highly insoluble |  |
| C6b    | Undefined             | Undefined        | Undefined        | Undefined         | Undefined        | Undefined        | Undefined | Undefined | Highly permeable     | Moderately bound  | Penetrant      | Highly absorbed | Undefined           | Optimal            | Good     | Good     | Good        | Good       | Good  | Good     | Good      | Insoluble        |  |

|     |           |           |           |           |           |           |           |           |                  |                   |           |                 |           |         |      |      |      |      |      |      |      |      |                  |
|-----|-----------|-----------|-----------|-----------|-----------|-----------|-----------|-----------|------------------|-------------------|-----------|-----------------|-----------|---------|------|------|------|------|------|------|------|------|------------------|
| C9  | Undefined | Highly permeable | Moderately bound  | Penetrant | Highly absorbed | Undefined | Optimal | Good | Highly insoluble |
| C10 | Undefined | Highly permeable | Extensively bound | Penetrant | Highly absorbed | Undefined | Optimal | Good | Insoluble        |
